# Supplementary material for: The Intervention and Mechanism of Action for Aloin against Subchronic Aflatoxin B1 Induced Hepatic Injury in Rats
Source: MDPI journal article supplement (doi:10.3390/ijms222111620), 2021-10-27
Supplement: s1 [file ijms-1401217-supplementary.pdf › ijms-1401217-supplementary.pdf]

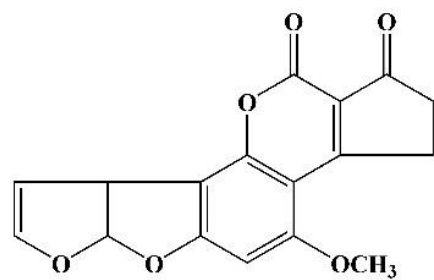

**AFB<sub>1</sub>**

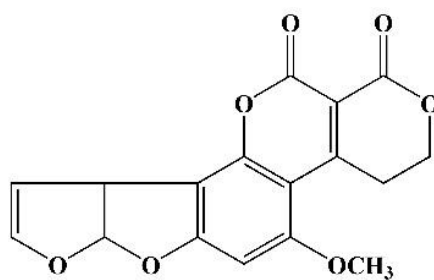

**AFG<sub>1</sub>**

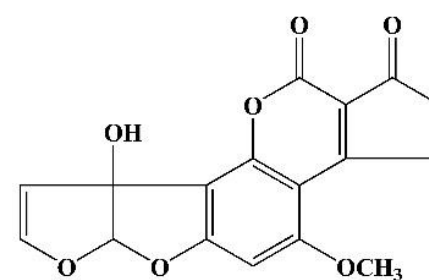

**AFM<sub>1</sub>**

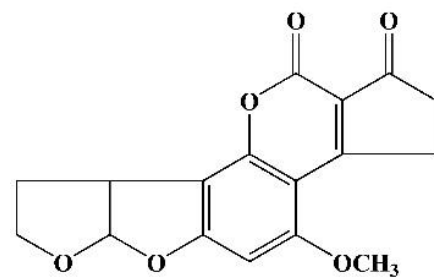

**AFB<sub>2</sub>**

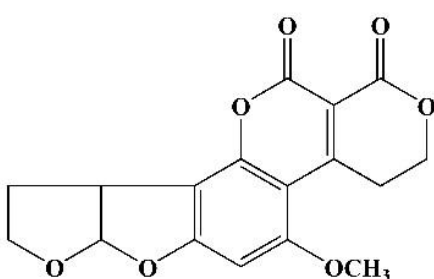

**AFG<sub>2</sub>**

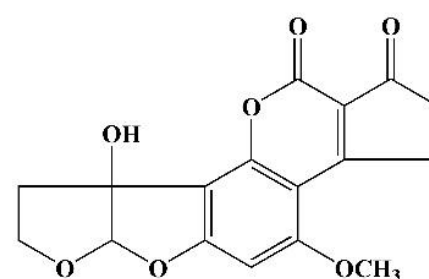

**AFM<sub>2</sub>**

Figure S1. Chemical structure of the key aflatoxins

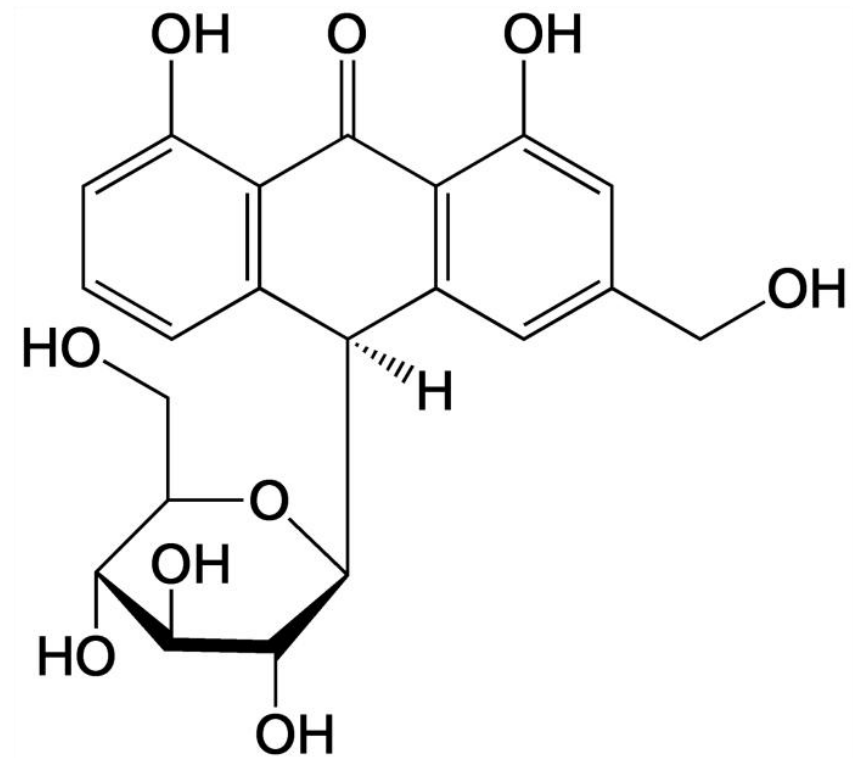

Figure S2. Chemical structure of aloin

Table S1. The specific primer sequence information

| Name          | Sequences of primers (5'–3')                                                         |
|---------------|--------------------------------------------------------------------------------------|
| GADPH         | Sense: 5'- CAACGGGAAACCCATCACCA-3'<br>Antisense: 5'- ACGCCAGTAGACTCCACGACAT-3'       |
| CYP1A2        | Sense: 5'- CCCTGAAGAGTTTCTCCATAGCC-3'<br>Antisense: 5'- GATGACATTAGCCACCGATTCC-3'    |
| CYP3A         | Sense: 5'- GGCAAACCTGTCCCTGTGAAAG-3'<br>Antisense: 5'- TGGCGTGAGGAATGGAAAGAGTA-3'    |
| IL-1 $\beta$  | Sense: 5'-GTGGTATTCTCCATGAGCTTTGTA-3'<br>Antisense: 5'-CCATCTTCTTCTTTGGGTATTGTT-3'   |
| TNF- $\alpha$ | Sense: 5'-TCTGTCTACTGAACTTCGGGGTGAT-3'<br>Antisense: 5'-CTGCTTGGTGGTTTGCTACGAC-3'    |
| IL-6          | Sense: 5'- AGACTTCACAGAGGATACCACCCAC-3'<br>Antisense: 5'- CAATCAGAATTGCCATTGCACAA-3' |
